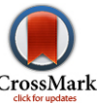

# Breastfeeding Progression in Preterm Infants Is Influenced by Factors in Infants, Mothers and Clinical Practice: The Results of a National Cohort Study with High Breastfeeding Initiation Rates

Ragnhild Maastrup<sup>1,2,3\*</sup>, Bo Moelholm Hansen<sup>4</sup>, Hanne Kronborg<sup>5</sup>, Susanne Norby Bojesen<sup>3,4</sup>, Karin Hallum<sup>3,6</sup>, Annemi Frandsen<sup>3,7</sup>, Anne Kyhnaeb<sup>3,8</sup>, Inge Svarer<sup>3,9</sup>, Inger Hallström<sup>2</sup>

**1** Knowledge Centre for Breastfeeding Infants with Special Needs at Department of Neonatology, Copenhagen University Hospital Rigshospitalet, Copenhagen, Denmark, **2** Department of Health Sciences, Faculty of Medicine, Lund University, Lund, Sweden, **3** Danish National Panel of Experts on Breastfeeding Infants with Special Needs, Copenhagen, Denmark, **4** Department of Neonatology, Copenhagen University Hospital Herlev, Herlev, Denmark, **5** Department of Public Health, Section of Nursing, University of Aarhus, Aarhus, Denmark, **6** Department of Neonatology, Viborg Regional Hospital, Viborg, Denmark, **7** Paediatric Department, Holbaek University Hospital, Holbaek, Denmark, **8** Department of Neonatology, Copenhagen University Hospital Hvidovre, Hvidovre, Denmark, **9** Department of Neonatology, Odense University Hospital, Odense, Denmark

## Abstract

**Background and Aim:** Many preterm infants are not capable of exclusive breastfeeding from birth. To guide mothers in breastfeeding, it is important to know when preterm infants can initiate breastfeeding and progress. The aim was to analyse postmenstrual age (PMA) at breastfeeding milestones in different preterm gestational age (GA) groups, to describe rates of breastfeeding duration at pre-defined times, as well as analyse factors associated with PMA at the establishment of exclusive breastfeeding.

**Methods:** The study was part of a prospective survey of a national Danish cohort of preterm infants based on questionnaires and structured telephone interviews, including 1,221 mothers and their 1,488 preterm infants with GA of 24–36 weeks.

**Results:** Of the preterm infants, 99% initiated breastfeeding and 68% were discharged exclusively breastfed. Breastfeeding milestones were generally reached at different PMAs for different GA groups, but preterm infants were able to initiate breastfeeding at early times, with some delay in infants less than GA 32 weeks. Very preterm infants had lowest mean PMA (35.5 weeks) at first complete breastfeed, and moderate preterm infants had lowest mean PMA at the establishment of exclusive breastfeeding (36.4 weeks). Admitting mothers to the NICU together with the infant and minimising the use of a pacifier during breastfeeding transition were associated with 1.6 (95% CI 0.4–2.8) and 1.2 days (95% CI 0.1–2.3) earlier establishment of exclusive breastfeeding respectively. Infants that were small for gestational age were associated with 5.6 days (95% CI 4.1–7.0) later establishment of exclusive breastfeeding.

**Conclusion:** Breastfeeding competence is not developed at a fixed PMA, but is influenced by multiple factors in infants, mothers and clinical practice. Admitting mothers together with their infants to the NICU and minimising the use of pacifiers may contribute to earlier establishment of exclusive breastfeeding.

**Citation:** Maastrup R, Hansen BM, Kronborg H, Bojesen SN, Hallum K, et al. (2014) Breastfeeding Progression in Preterm Infants Is Influenced by Factors in Infants, Mothers and Clinical Practice: The Results of a National Cohort Study with High Breastfeeding Initiation Rates. PLoS ONE 9(9): e108208. doi:10.1371/journal.pone.0108208

**Editor:** Tammy Clifford, Canadian Agency for Drugs and Technologies in Health, Canada

**Received:** April 16, 2014; **Accepted:** August 20, 2014; **Published:** September 24, 2014

**Copyright:** © 2014 Maastrup et al. This is an open-access article distributed under the terms of the Creative Commons Attribution License, which permits unrestricted use, distribution, and reproduction in any medium, provided the original author and source are credited.

**Data Availability:** The authors confirm that, for approved reasons, some access restrictions apply to the data underlying the findings. The data are available on request from the Danish Data Archive (<http://samfund.daa.dk/ddakatalog/> and [http://www.sa.dk/content/us/about\\_us/danish\\_data\\_archive](http://www.sa.dk/content/us/about_us/danish_data_archive)) for researchers who meet the criteria for access to confidential data. This restriction is due to ethical compliance. The data could rather easily be de-anonymised due to the small number of extremely preterm infants in Denmark, and violate the privacy and confidentiality of personal information of research subjects. The data are categorised as personal sensitive data and covered by the Act of Processing of Personal Data in Denmark.

**Funding:** The authors disclosed receipt of the following financial support for the research and authorship of this article: Funding to support the research was received from The Swedish Research Council: <http://www.vr.se/inenglish.4.12fff4451215cbd83e4800015152.html>; Soester Marie Dalgaard's Foundation: <http://www.diakonissestiftelsen.dk/Default.aspx?ID=1177>; the Neonatal Department at Rigshospitalet Copenhagen: <http://www.rigshospitalet.dk/menu/AFDELINGER/Juliane+Marie+Centret/Klinikker/NeonatalKlinikken/>; and Juliane Marie Centre at Rigshospitalet Copenhagen: <http://www.rigshospitalet.dk/menu/AFDELINGER/Juliane+Marie+Centret/In+English/>. The funders had no role in study design, data collection and analysis, decision to publish, or preparation of the manuscript.

**Competing Interests:** The authors have declared that no competing interests exist.

\* Email: [Ragnhild.maastrup@regionh.dk](mailto:Ragnhild.maastrup@regionh.dk)

## Background

Breastfeeding is important to preterm infants, as it seems to provide even more pronounced health benefits than to infants born at term age [1], [2], [3], [4], [5], [6]. Even though there are significant variations in preterm breastfeeding rates between countries [7], [8], [9], [10], [11], [12], [13], [14] and neonatal intensive care units (NICUs) within countries [7], [14] preterm infants are not breastfed to the same extent as term infants [7]. Thus in many countries the breastfeeding process is not initiated to the same extent as in term infants [8], [9], [10], [11], [15], [16], [17], [18], and even though the mother tries to establish breastfeeding, the success rates measured as breastfeeding at discharge are relatively lower [12], [13], [14]. Furthermore, studies find that the duration of breastfeeding of preterm infants is also shorter compared to infants born at term [13], [19], [20], and one study found that infants born at the lowest gestational age (GA) were breastfed for the shortest duration [13]. Some of the benefits of breast milk in very preterm infants during the first weeks of life are well recognised, such as reduced risk of NEC [2], [21] and infections [1], which is why breastfeeding guidance is an important part of neonatal nursing care [22], [23].

To promote the breastfeeding process in preterm infants, knowledge of the expected postmenstrual age (PMA) at which the majority of preterm infants reach different breastfeeding milestones, together with an individual assessment, is an important tool for supporting mothers in breastfeeding their infants.

### Breastfeeding milestones

Feeding milestones in breastfed preterm infants, defined as the age at which a skill is achieved [26], have not been well-studied compared to bottle-fed preterm infants [23], [24], [25], [26], [27], [28], and since infant sucking skills seems to differ between bottle- and breastfeeding, data gathered from bottle-feeding are not necessarily applicable to breastfeeding [29].

Feeding milestones for preterm infants are commonly described as initiation of oral feeding/breastfeeding and the achievement of full oral feeding/exclusive breastfeeding [12], [23], [24], [27], [28], [30]. However other milestones might be considered. Skin-to-skin contact is the first step in the breastfeeding process, as it promotes breastfeeding behaviour [31] and is positively associated with breastfeeding duration in preterm infants [32]. Another milestone is the nutritive sucking of a fixed number of mls [12], [23], [24], [25], [28], which requires test-weighing in breastfed infants, something that is not used routinely at all NICUs [22].

### Postmenstrual age

Most preterm infants are not able to breastfeed exclusively at birth because of immaturity and/or illness. A Swedish study of preterm infants with GA 26–35 weeks found that breastfeeding in clinically stable preterm singleton infants was initiated from 27.9 weeks PMA, and exclusive breastfeeding was established at median 36.0 weeks PMA [24]; infants with GA 26–31 weeks established exclusive breastfeeding slightly earlier (35.7 weeks) [23]. The studies were, however, based on small numbers of infants, making it difficult to determine whether PMA at the establishment of exclusive breastfeeding differed significantly according to GA; also, the studies included only preterm singletons without severe morbidity. Thus research is lacking about what can be expected in breastfeeding progress for infants with low and high GA, including both singletons and multiples. It has not been investigated whether preterm infants reach the various breastfeeding milestones at a fixed PMA regardless of GA or whether clinical

procedures and other factors are associated with the PMA at establishment of exclusive breastfeeding.

## Aims

The aims were to describe rates of breastfeeding duration at pre-defined times in various preterm gestational age groups, to analyse the postmenstrual age at breastfeeding milestones in various preterm GA groups, and to analyse factors associated with postmenstrual age at establishment of exclusive breastfeeding.

## Methods

### Ethics Statement

The study was conducted in accordance with the Declaration of Helsinki [33] and approved by the Danish Data Protection Agency (j.nr. 2009-41-4024); surveys do not, according to Danish law, need to be approved by the Biomedical Research Ethics Committee. Mothers gave their written informed consent to participate.

### Design

The study was part of a prospective survey of a national Danish cohort of preterm infants based on questionnaires and structured telephone interviews conducted from September 2009 to December 2011. This article is the second from the cohort; the first article analysed factors associated with exclusive breastfeeding at discharge and adequate duration [14].

### Setting

Denmark, with its 5.5 million inhabitants, has about 60,000 births per year, 7% of which are premature. Denmark has public health care, and all citizens enjoy easy and equal access to health care in public hospitals free of charge [34].

Most of the preterm infants are admitted to one of Denmark's 19 NICUs, except for stable late preterm infants born after 35+0 gestational weeks, who are cared for in postpartum wards. Four NICUs provide high-intensive care, 14 medium-intensive care, and one low-intensive care [22].

The breastfeeding support given at Danish NICUs includes skin-to-skin contact, support of breast milk expression, rooming-in for at least a part of the infant's hospitalisation and support of the parents' presence [22]. Most Danish NICUs use a transition strategy with scheduled feedings and decreased tube feedings but different assessment methods (test-weighing or estimate by the mother/nurse). Preterm infants are hospitalised until breastfeeding is well established or exclusive breastfeeding is given up and mixed feeding or bottle-feeding is established [22].

### Instruments

Based on a review of the literature and a national expert panel, three study-specific questionnaires for mothers of preterm infants were developed to explore rates and progress of breastfeeding in preterm infants and the use of various clinical practises to facilitate breastfeeding. The national expert panel consisted of eight neonatal nurses with experience in the breastfeeding of preterm infants and research, four of whom were International Board Certified Lactation Consultants.

The questionnaires included background questions and questions about the infant's breastfeeding progression, the mother's breastfeeding experience and clinical practice. Questionnaire 1 with 38 questions was answered by mothers approximately one week after delivery, and questionnaire 2 with 59 questions was answered by the mother at the infant's discharge from NICU to

home. Questionnaire 3 with 17 questions was used for structured telephone interviews with breastfeeding mothers at the infant's 1, 4, 6 and 12 months corrected age or until breastfeeding ceased, whichever occurred first. More details and the questionnaires can be found in a previously published paper [14].

### Participants and data collection

Inclusion criteria were preterm infants of less than 37 gestational weeks who were admitted to a NICU during the first five days of life from 1 September 2009 to 31 August 2010, as well as their mothers. Exclusion criteria were infant discharge to maternity units before five days of age, interpreter not available for a non-Danish speaking mother or neonatal death. Mothers who did not plan to breastfeed and in addition did not initiate breast milk expression participated only with the first questionnaire, and their data were not included in the analyses in the present paper.

All departments in Denmark that routinely take care of preterm infants during breastfeeding establishment participated in the study, which included 18 of the 19 NICUs, two special care units and one children's department; 18 of the 21 participating units adhered to the project protocol [14]. The data set used in the present paper is publicly available at the Danish Data Archive on request for researchers who meet the criteria for access to confidential data.

### Outcomes

Outcomes selected for the present study were:

- The percentage of infants initiating skin-to-skin contact during five different time periods.
- PMA at breastfeeding milestones as described below. As not all Danish NICUs use test-weighing routinely, the PMA at first complete breastfeeding was selected as a breastfeeding milestone between initiation of breastfeeding and exclusive breastfeeding for the present study.
- The percentage of infants initiating breastfeeding and exclusively breastfed at 1, 4 and 6 months, as well as performing any breastfeeding at 1, 4, 6 and 12 months of chronological and corrected age.

### Definitions of terminology

#### Breastfeeding

- Exclusive breastfeeding was defined as an infant feeding directly at and from the breast, and can include medication and vitamins.
- Any breastfeeding included other feeding methods (such as bottle, cup, lact-aid, regardless of content) in addition to directly breastfeeding.
- For telephone follow-up the infants were regarded exclusively breastfed when they were only feeding at and from the breast, besides breastfeeding water and/or a maximum of one formula feed could be given a week.

Breastfeeding milestones were defined as the PMA at

- Breastfeeding initiation, defined as the mother's description of when the baby was first placed at the breast for licking, tasting and maybe latching, but not necessarily sucking and sinking.
- First complete breastfeeding, defined as the mother's description of when the baby first completed breastfeeding (the prescribed volume, or if it was deemed that the infant did not

need supplementation feeding). For infants not exclusively breastfed, this milestone was the "first complete oral feeding".

- Establishment of exclusive breastfeeding defined as the mother's description of when the baby took all at and from the breast. For infants not exclusively breastfed, this milestone was "full oral feeding".
- Discharge from NICU to home.

Skin-to-skin contact was defined as the infant – wearing only a diaper and maybe a cap and socks – lying on its parent's bare chest.

Preterm infant gestational age groups (GA groups) were divided into four groups depending on gestational age (GA) in weeks + days [35], [36]:

- Extremely preterm infants: GA 24+0 – 27+6.
- Very preterm infants: GA 28+0 – 31+6.
- Moderate preterm infants: GA 32+0 – 34+6.
- Late preterm infants: GA 35+0 – 36+6.

For this study, the lower limit for late preterm infants was set at 35+0 weeks and days, given that preterm infants with GA less than 35+0 weeks and days are admitted routinely to NICUs in Denmark regardless of their physical situation.

Age definitions [37]:

- Chronological age = postnatal age (PNA): time elapsed from birth.
- Postmenstrual age (PMA): gestational age plus chronological age.
- Corrected age: chronological age reduced by the number of weeks born before 40 weeks of gestation.

### Statistical analyses

SPSS version 21.0 was used for statistical analyses. Descriptive statistics were used to describe mother and infant characteristics. The normally distributed results are reported with mean and standard deviation (SD); the remaining results are reported with median, interquartile range (IQR) or percentages [38]. One-way ANOVA was used to determine statistically significant differences in normally distributed scale data between GA groups. Pearson's Chi-Square test was used to determine statistically significant differences for nominal data. A scatter plot was performed and a curve was fitted for correlation between GA and PMA at the establishment of exclusive breastfeeding. Breastfeeding duration for infants lost to follow up were adjusted to the time at the latest answered questionnaire and the analyses performed with all infants.

PMA at the establishment of exclusive breastfeeding was analysed by linear regression models. The explanatory variables were first analysed in univariate models; subsequently the variables with a p-value of less than 0.2 were analysed simultaneously in a multiple stepwise backward model stepwise removing variables with  $p < 0.05$ . The regression analyses were performed with one infant per mother to ensure that mothers of twins were not counted twice [38]; for multiple births, the first born infant was included. Values of  $p < 0.05$  were considered statistically significant.

The explanatory variables included in the stepwise backward general linear regression model were

- GA in weeks, broken down into four groups as described above
- Multiple births

- Being small for gestational age (SGA), defined as birth weight more than two standard deviations (SD) smaller than expected according to GA
- Mechanical ventilation
- First-time mothers
- Mother speaking another language than Scandinavian at home
- Admitting the mother together with the infant in the NICU directly after delivery
- Skin-to-skin contact on a daily basis after incubator care
- Pacifier use during hospitalisation, broken down into three groups: no use of a pacifier, minimising the use of a pacifier during breastfeeding transition, and unrestricted use of a pacifier

One or more of the following practices may be regarded as minimising the use of a pacifier during the transition from tube-feeding to breastfeeding: predominantly using the pacifier during tube-feedings, painful or stressful events, predominantly using the pacifier in the mother's absence, or removing the pacifier completely

## Results

### Participant selection

Selection of participants is described in the flow chart (see Figure 1). Data on breastfeeding at discharge were available for 1,488 infants (65% of those eligible) and 1,221 mothers. Data on breastfeeding duration at 1, 4, 6 and 12 months were available for between 1,345 and 1,441 infants at the various times (90–97% of the 1,488 infants).

Significantly fewer of mothers of extremely preterm infants eligible for inclusion participated at discharge from NICU compared to mothers of older infants ( $p < 0.0001$ ). Of mothers participating with questionnaire 1, significantly more of those who did not return questionnaire 2 had a lower level of education ( $p < 0.001$ ).

Table 1 shows mother and infant characteristics. Mothers had a mean age of 31; nearly all mothers had planned to breastfeed. Of the infants, 60 were extremely preterm, 257 were very preterm, 688 were moderate preterm, and 483 were late preterm; 36% were multiples. When the mothers had planned to breastfeed and/or initiated breast milk expression, 99% of the infants initiated breastfeeding. Twenty-one per cent of the infants had their first breastfeeding experience in combination with CPAP treatment, with significantly more of the extremely preterm infants (62%) suckling with CPAP ( $p < 0.0001$ ). In Denmark, the use of mechanical ventilation is minimised by early nasal CPAP and INSURE (INtubate SURfactant Extubate) [39], thus, only 6% of infants were mechanically ventilated.

### Age at breastfeeding milestones

Of all the infants 27% initiated skin-to-skin contact immediately postpartum (pp), 27% did so later but within 6 hours pp, 27% did so later than six hours pp but during the first 24 hours of life (Table 2), with significantly fewer of extremely and very preterm infants initiating skin-to-skin contact within 24 hours of birth ( $p < 0.0001$ ).

Extremely and very preterm infants initiated breastfeeding at mean PMA 31.8 and 32.0 weeks respectively (Figure 2). Of the extremely preterm infants, 21% ( $n = 10$ ) initiated breastfeeding before PMA 30 weeks. The median postnatal age (PNA) was inversely related to GA as the extremely, very, moderate and

late preterm infants were 39, eight, two and zero postnatal days respectively at breastfeeding initiation ( $p < 0.0001$ ) (Table 2).

The very preterm infants reached the milestone “first complete breastfeed” at the significantly lowest mean PMA (35.5 weeks), whereas the moderate preterm infants had the significantly lowest mean PMA (36.3 weeks) at the establishment of breastfeeding (Table 2). The best fit describing the correlation between GA and PMA at the establishment of exclusive breastfeeding was a quadratic curve (Figure 3), showing that infants with low and high GAs established breastfeeding at higher PMA than infants in between. Of the infants who established exclusive breastfeeding, 98% did so before corrected term age, with 32.9 weeks as the lowest observed PMA.

The extremely preterm infants had the longest transition time from breastfeeding initiation to discharge and the largest variation in PMA at each breastfeeding milestone. The late preterm infants had the most accelerated breastfeeding progress, as shown in Figure 2.

Infants in all GA groups had significantly different mean PMA at all breastfeeding milestones, except the extremely preterm infants, whose mean PMA was not significantly different from the mean PMA of the very preterm infants at breastfeeding initiation, neither from the moderate preterm infants at first complete breastfeeding nor from the late preterm infants at establishment of exclusive breastfeeding (Figure 2). At establishment of exclusive breastfeeding, the very and moderate preterm infants did not differ in mean PMA. At discharge, the very preterm and late preterm infants did not differ in mean PMA. All GA groups had significantly different median PNAs at each breastfeeding milestone.

### Factors associated with PMA at establishment of exclusive breastfeeding

A multiple linear regression analysis with 749 of the 858 mother-infant pairs where the PMA was known, showed that factors significantly associated with later establishment of exclusive breastfeeding were small for gestational age (SGA) (5.6 days (95% CI 4.1–7.0)), multiple birth (2.3 days (95% CI 0.9–3.7)), infant having been mechanically ventilated (4.6 days (95% CI 2.0–7.1)), first-time mother (1.2 days later (95% CI 0.1–2.2)), and initiating breast milk expression later than 24 hours after delivery (see Table 3). Factors significantly associated with earlier establishment of exclusive breastfeeding were mother speaking another language than Scandinavian in her home (2.8 days (95% CI 0.6–5.0)), admitting a mother to the NICU together with her infant directly after delivery (1.6 days (95% CI 0.4–2.8)), minimising the use of a pacifier during breastfeeding transition (1.2 days (95% CI 0.1–2.3)), and continuing skin-to-skin contact on a daily basis after incubator care (1.1 days (95% CI 0.0–2.1)) (see Figure 4). The model could explain 29% of the difference in PMA at the establishment of exclusive breastfeeding.

### Feeding methods at breastfeeding milestones

At the first complete oral feeding 79% of the infants were breastfed, 8% fed from a combination of breast and bottle/cup and 13% were only bottle-fed. Of the infants solely breastfed at the first complete feeding, fewer than 2% were fed by bottle at any feeding session the rest of that day and the majority (66%) were fed by a combination of breast and tube feeding. At the milestone of full oral feeding, 73% of the infants were exclusively breastfed, with significantly fewer of extremely preterm infants being exclusively breastfed ( $p < 0.0001$ ) (see Figure 5). At discharge, 68% of the infants were exclusively breastfed and 17% were partially breastfed. Again, significantly fewer (50%) of the

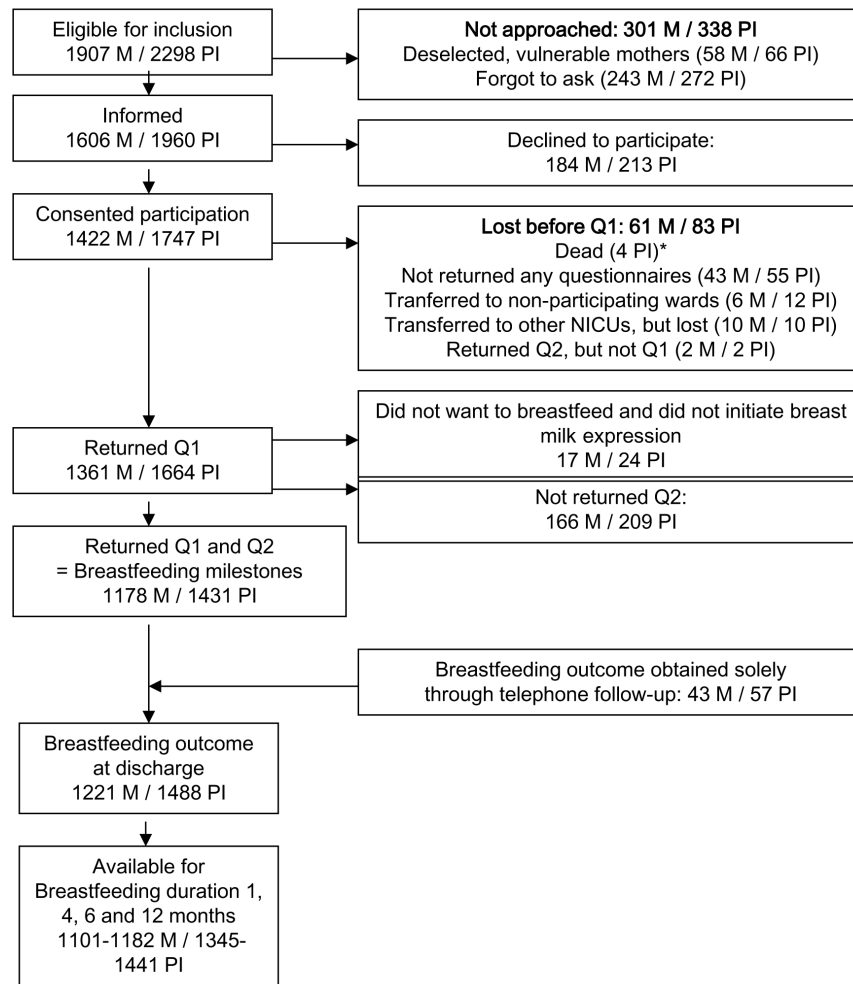

**Figure 1. Flowchart.** BF = breastfeeding, M = mothers, NICU = Neonatal Intensive Care Unit, PI = preterm infants, Q = Questionnaire. \*The four infants who died after inclusion were all twins; no mothers were lost due to infant death. doi:10.1371/journal.pone.0108208.g001

extremely preterm infants were exclusively breastfed ( $p < 0.001$ ). Of the infants exclusively breastfed at discharge, significantly more (95%) had their first complete feeding solely from the breast ( $p < 0.0001$ ).

#### Breastfeeding duration at 1, 4, 6 and 12 months of age

For the total infant population, 13% were exclusively breastfed at six months chronological age, and including partially breastfed infants, 44% were breastfed at this time (Table 4). At six months corrected age, the corresponding percentages were 2% and 34%. At six months corrected age significantly more of the infants who were exclusively breastfed at discharge were still breastfeeding to any extent compared to infants who were exclusively breast milk fed (some or all of the breast milk in bottle) at discharge (45 and 23% respectively) ( $p < 0.0001$ ).

At a glance, more extremely preterm infants were breastfed at chronological age times and fewer at corrected age times and this pattern was significant for exclusive breastfeeding at one and four months corrected age, as well as six months chronological age (Table 4).

#### Discussion

In the present study, almost all preterm infants of mothers who planned to breastfeed (99%) initiated breastfeeding at the NICU and 79% of the infants performed their first complete oral feeding at the breast. These rates are higher compared to the preterm initiation rates in the U.S. (62%) and Australia (80%–86%) [10], [11], [12] and similar to the initiation rate of term infants in Denmark (99%) [18]. The high initiation rates in the present study may be due to Danish NICUs' high priority of breastfeeding support, as reflected in their self-reported practices of early skin-to-skin contact, breast milk expression, parental presence, restricted use of bottle-feeding [22] and the cultural norm of breastfeeding initiation [18]. When the first complete feeding was exclusively at the breast, bottle-feeding for the rest of the feedings that day was rare in the present study, with less than 2% of the infants fed by bottle. These results support the NICUs' self-reported restricted use of bottle-feeding [22] and may contribute to the relatively high rate of exclusively breastfed infants at discharge.

Skin-to-skin contact was widely used at the Danish NICUs and initiated by a large proportion (81%) of preterm infants during the first 24 hours of life, while an additional 16% initiated skin-to-skin contact later during the first week of life. Initiation time of skin-to-

**Table 1.** Infant and maternal characteristics.

| Cohort data                                              | N    | Total population    | GA 24–27            |                     | GA 28–31            |                     | GA 32–34 |  | GA 35–36 |  | p-value |
|----------------------------------------------------------|------|---------------------|---------------------|---------------------|---------------------|---------------------|----------|--|----------|--|---------|
|                                                          |      |                     | n = 60              |                     | n = 257             | n = 688             | n = 483  |  |          |  |         |
| <b>Infant</b>                                            |      |                     |                     |                     |                     |                     |          |  |          |  |         |
| Median gestational age (IQR), weeks + days               | 1488 | 34+1<br>(32+2–35+2) | 26+5<br>(25+4–27+3) | 30+4<br>(29+3–31+2) | 33+6<br>(33+0–34+3) | 36+6<br>(35+2–36+3) |          |  |          |  |         |
| Multiple birth, %                                        | 1488 | 36                  | 33                  | 32                  | 37                  | 36                  |          |  |          |  |         |
| SGA, %                                                   | 1474 | 18                  | 17                  | 21                  | 15                  | 21                  |          |  |          |  |         |
| Gender, boys, %                                          | 1488 | 51                  | 55                  | 55                  | 53                  | 47                  |          |  |          |  |         |
| Initiated breastfeeding, %                               | 1471 | 99                  | 95                  | 99                  | 99                  | 100                 |          |  |          |  | <0.0001 |
| Mechanical ventilation, %                                | 1401 | 6                   | 60                  | 11                  | 3                   | 3                   |          |  |          |  | <0.0001 |
| Nasal CPAP treatment, %                                  | 1387 | 59                  | 100                 | 97                  | 60                  | 33                  |          |  |          |  | <0.0001 |
| Minimising the use of a pacifier during BF transition, % | 1386 | 28                  | 26                  | 33                  | 31                  | 22                  |          |  |          |  | 0.001   |
| <b>Mother</b>                                            |      |                     |                     |                     |                     |                     |          |  |          |  |         |
| Mean age, years (SD)                                     | 1219 | 31 (5)              | 31 (5)              | 31 (5)              | 31 (5)              | 31 (5)              |          |  |          |  |         |
| Lives together with infant's father, %                   | 1219 | 96                  | 98                  | 94                  | 96                  | 96                  |          |  |          |  |         |
| Danish/Scandinavian origin, %                            | 1215 | 93                  | 92                  | 93                  | 93                  | 93                  |          |  |          |  |         |
| Education, high (>16 years), %                           | 1207 | 20                  | 20                  | 21                  | 20                  | 19                  |          |  |          |  |         |
| Education, intermediate (14–16 years), %                 |      | 47                  | 56                  | 46                  | 46                  | 48                  |          |  |          |  |         |
| Education, low or none (<14 years), %                    |      | 33                  | 24                  | 34                  | 34                  | 34                  |          |  |          |  |         |
| Smoking, %                                               | 1210 | 10                  | 12                  | 9                   | 10                  | 11                  |          |  |          |  |         |
| Primiparous, %                                           | 1171 | 65                  | 70                  | 72                  | 63                  | 63                  |          |  |          |  |         |
| Mode of delivery, caesarean section, %                   | 1219 | 50                  | 53                  | 60                  | 49                  | 47                  |          |  |          |  | 0.014   |
| Mother admitted into the NICU directly from birth, %     | 1207 | 29                  | 4                   | 15                  | 26                  | 42                  |          |  |          |  | <0.0001 |
| Planned to breastfeed, %                                 | 1213 | 99                  | 96                  | 99                  | 99                  | 99                  |          |  |          |  |         |
| Spouse supports breastfeeding plans, %                   | 1210 | 97                  | 100                 | 95                  | 97                  | 98                  |          |  |          |  |         |
| Breastfed other infants exc<>4 months, %                 | 1171 | 17                  | 19                  | 17                  | 16                  | 17                  |          |  |          |  |         |

Excl = exclusively, NICU = Neonatal Intensive Care Unit, N = Number included in analyses, n = subgroup numbers, SD = standard deviation, SGA = small for gestational age  
doi:10.1371/journal.pone.0108208.t001

**Table 2.** Breastfeeding milestones for various gestational age groups.

|                                                       | Total |            |    |             |     |            |     |            |     |            |
|-------------------------------------------------------|-------|------------|----|-------------|-----|------------|-----|------------|-----|------------|
|                                                       | N     | population | n  | GA 24-27    | n   | GA 28-31   | n   | GA 32-34   | n   | GA 35-36   |
| Skin-to-skin contact immediately after delivery       | 1481  | 27%        | 1  | 2%          | 18  | 7%         | 204 | 30%        | 176 | 37%        |
| from minutes to 6 hours pp                            |       | 27%        | 2  | 3%          | 44  | 17%        | 220 | 32%        | 136 | 29%        |
| 6-24 hours pp                                         |       | 27%        | 11 | 18%         | 101 | 40%        | 188 | 27%        | 100 | 21%        |
| 24-48 hours pp                                        |       | 10%        | 6  | 10%         | 60  | 23%        | 48  | 7%         | 27  | 6%         |
| More than 48 hours pp                                 |       | 7%         | 31 | 52%         | 33  | 13%        | 15  | 2%         | 21  | 4%         |
| Not skin-to-skin with mother within 7 days            |       | 3%         | 9  | 15%         | 0   | 0%         | 12  | 2%         | 18  | 4%         |
|                                                       |       | Mean (SD)  |    | Mean (SD)   |     | Mean (SD)  |     | Mean (SD)  |     | Mean (SD)  |
| Birth weight (grams)                                  | 1330  | 2094 (582) | 47 | 833 (158)   | 211 | 1443 (301) | 617 | 2128 (412) | 455 | 2480 (454) |
| Initiation of breastfeeding, PMA (weeks)              | 1344  | 34.4 (1.8) | 48 | 31.8 (2.3)  | 213 | 32.0 (1.3) | 619 | 34.2 (1.0) | 464 | 36.1 (0.7) |
| Initiation of breastfeeding, weight (grams)           | 1300  | 2113 (530) | 45 | 1329 (452)  | 203 | 1527 (294) | 599 | 2103 (409) | 453 | 2466 (435) |
| First complete breastfeeding, PMA (weeks)             | 1047  | 36.1 (1.2) | 35 | 36.3 (2.1)  | 170 | 35.5 (1.5) | 507 | 35.8 (1.0) | 335 | 37.0 (0.8) |
| Establishment of exclusive breastfeeding, PMA (weeks) | 1002  | 36.7 (1.2) | 29 | 37.5 (2.0)  | 162 | 36.6 (1.6) | 479 | 36.3 (1.1) | 332 | 37.3 (0.9) |
| Discharged exclusively breastfed, PMA (weeks)         | 974   | 37.5 (1.6) | 29 | 39.8 (3.0)  | 149 | 37.6 (1.8) | 462 | 37.1 (1.5) | 334 | 37.7 (0.9) |
| Discharge weight exclusively breastfed (grams)        | 913   | 2583 (374) | 28 | 2655 (489)  | 141 | 2580 (376) | 438 | 2568 (368) | 306 | 2600 (371) |
| Initiation of bottle-feeding, PMA (weeks)             | 460   | 36.8 (1.6) |    | 37.4 (2.4)  |     | 36.1 (2.0) |     | 36.6 (1.5) |     | 37.4 (1.0) |
|                                                       |       | Median     |    | Median      |     | Median     |     | Median     |     | Median     |
|                                                       |       | (IQR)      |    | (IQR)       |     | (IQR)      |     | (IQR)      |     | (IQR)      |
| Initiation of breastfeeding, PNA (days)               | 1344  | 1 (0-5)    |    | 39 (21-51)  |     | 8 (4-17)   |     | 2 (1-4)    |     | 0 (0-1)    |
| First complete breastfeeding, PNA (days)              | 1047  | 13 (8-22)  |    | 66 (56-78)  |     | 34 (26-45) |     | 14 (10-19) |     | 7 (4-11)   |
| Establishment of exclusive breastfeeding, PNA (days)  | 1002  | 16 (11-25) |    | 78 (64-89)  |     | 41 (32-52) |     | 17 (13-22) |     | 10 (6-13)  |
| Discharge exclusively breastfed, PNA (days)           | 974   | 19 (13-31) |    | 86 (73-102) |     | 48 (37-61) |     | 20 (16-27) |     | 12 (8-16)  |

GA = gestational age, IQR, interquartile range, PMA = postmenstrual age, PNA = Postnatal age, pp = postpartum  
doi:10.1371/journal.pone.0108208.t002

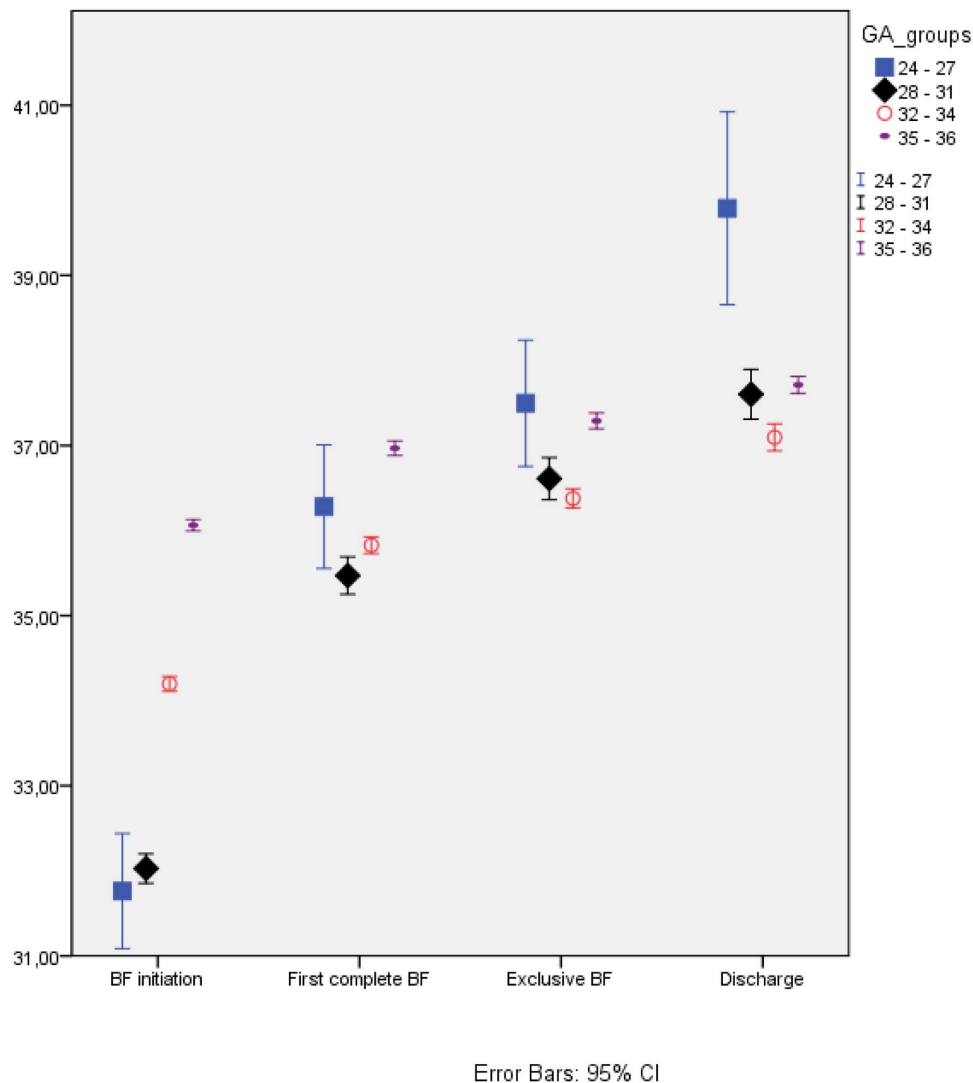

**Figure 2. Breastfeeding milestones for various gestational groups.** BF = breastfeeding, CI = confidence interval, GA groups = gestational age groups. doi:10.1371/journal.pone.0108208.g002

skin contact on a national level has been reported only in extremely preterm infants [40], showing a median initiation time of 6 days. In a smaller study of preterm infants with GA 28–34 weeks at two selected Swedish NICUs, 82% of the infants initiated skin-to-skin contact within the first 24 hours of life [41], which is comparable to the present study. The initiation time was not associated with PMA at establishment of exclusive breastfeeding.

The results of the breastfeeding milestones in our study show that it is possible for preterm infants to initiate breastfeeding at early times. Infants born before GA 32 weeks initiated breastfeeding at a mean PMA of approximately 32 weeks. However, breastfeeding progression was inversely related to GA; therefore, extremely and very preterm infants had higher PMA at establishment of exclusive breastfeeding. Still we believe that it is important to initiate breastfeeding at early times because it may promote breastfeeding at discharge [42]. The extremely and very preterm infants' higher PMA at establishment of exclusive breastfeeding may be related to slower or altered brain maturation caused by acute illness, nutrition, quality of experience or factors not yet known to science [43], [44], [45]. Thus the most preterm

infants suffer from more morbidity, have longer stays in an incubator and longer hospitalisation [46].

In the present study, breastfeeding was initiated by 21% of the extremely preterm infants before PMA 30 weeks; early initiation has previously been reported in Sweden [23], [24] and is also in line with the “expansion of the Baby-Friendly Hospital Initiative to Neonatal intensive care”, which recommends that the only criterion for preterm breastfeeding initiation be infant stability, i.e., independent of birth weight, GA, PMA, and PNA [47]. The mean PMA at establishment of exclusive breastfeeding in the present study was 36.7 weeks overall, with extremely preterm infants having the highest mean PMA. The results are supported by a large Australian study in which preterm infants established exclusive suckle feeding at mean PMA 36.4 weeks and extremely preterm infants were found to have higher mean PMA [12]. Although the Australian study included infants who were both breastfed and bottle-fed, it found no significant differences in PMA between exclusively, partially and non-breastfed infants. A Swedish study showed earlier establishment of exclusive breastfeeding (median PMA 36.0 weeks) [24]; however, it lacked



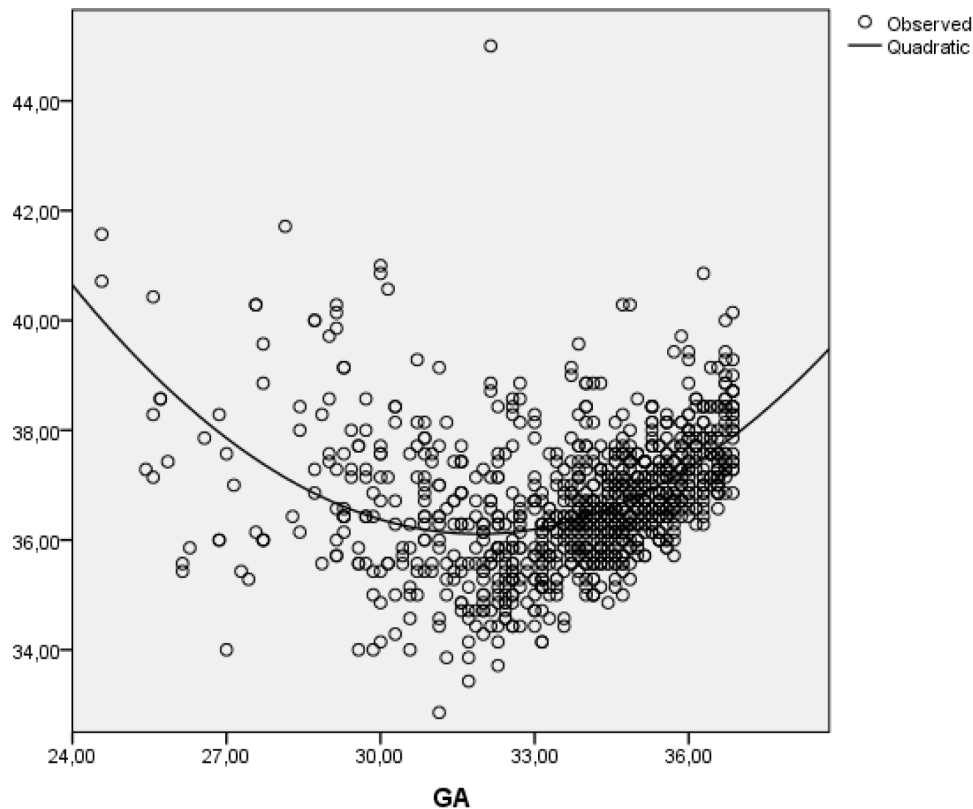

**Figure 3. Postmenstrual age at establishment of exclusive breastfeeding compared to gestational age (GA) at birth.**  
doi:10.1371/journal.pone.0108208.g003

participation of preterm infants with severe morbidity, extremely preterm infants and preterm infants with gestational age of 36 weeks.

The present study shows that mean PMA and median PNA at different breastfeeding milestones differ according to GA group in a large national population of preterm infants. Breastfeeding competences are thus not developed at a fixed PMA nor a fixed PNA, but rather are influenced by multiple factors in infant, mother and clinical practice. We found that multiples, infants who were SGA, infants who had been mechanically ventilated, and infants of first-time mothers, when adjusted for GA groups, were delayed in PMA at exclusive breastfeeding establishment.

The clinical practice of admitting mothers to the NICU together with the infant immediately after delivery was associated with earlier establishment of exclusive breastfeeding. The reason may be that the mother is able to observe and respond to the infant's early feeding cues, the opportunity for more breastfeeding sessions around the clock, and that mother and infant are not stressed out by separation, as rooming-in has shown to help parents feel as though they are a family and not just visitors to their own baby [48]. A Norwegian study found that when mothers were offered the chance to stay at the NICU for the infant's entire stay, more preterm infants were breastfed three months after discharge [49], and a Swedish study found that infants had significantly shorter hospital stays when parents were admitted to the NICU [50].

Minimisation of the use of a pacifier during breastfeeding transition was associated with earlier establishment of exclusive breastfeeding, which has not been researched before. It is reasonable to assume that infants who use a pacifier less at this stage are more keen to suck at the breast when offered and more likely to show hunger cues and breastfeed. The overall use of

pacifiers has not been associated with the timing of full oral feeding [51]. Continued skin-to-skin contact on a daily basis after incubator care was also associated with earlier establishment of exclusive breastfeeding. It has been assumed that skin-to-skin contact supports development in preterm infants, as accelerated neurophysiological development has been reported in preterm infants receiving daily skin-to-skin contact [52]. We do not know the reasons why mothers who spoke another language than Scandinavian in their home established breastfeeding earlier, why this needs further investigation. Our results do not support the hypothesis that preterm infants need temporary facilitation of milk intake with use of a nipple shield [53], [54], as exclusive breastfeeding was established at a mean of PMA 36.7 weeks, and not earlier by infants using nipple shields. The difference in findings could be due to previous studies having been small (15 and 34 infants), with no comparison group, or measuring any breastfeeding instead of exclusive breastfeeding.

The significantly longer duration of exclusive breastfeeding at six months chronological age for extremely preterm infants has not been reported in other studies, and should be interpreted with caution because of the higher drop-out of these infants. The duration of breastfeeding at corrected age is comparable to other studies and exceeded by a Swedish study [13]. The six-month rate (13%) of exclusive breastfeeding for preterm infants in the present study is comparable to the 12% exclusive breast milk fed full-term Danish infants [55]. It is important that preterm infants establish exclusive breastfeeding at and from the breast at discharge as this affects breastfeeding duration.

The present study is, to our knowledge, the largest one that has been conducted of preterm breastfeeding milestones. These data might be able to help clinicians guide a mother in breastfeeding

**Table 3.** Linear regression of factors associated with PMA at establishment of exclusive breastfeeding.

|                                                               | N   | Prev. % | Unadjusted analyses |         | Adjusted analysis |         |
|---------------------------------------------------------------|-----|---------|---------------------|---------|-------------------|---------|
|                                                               |     |         | Days (95% CI)       | p-value | Days (95% CI)     | p-value |
| <b>One infant per mother</b>                                  |     |         |                     |         |                   |         |
| <b>Later establishment of exclusive breastfeeding, days</b>   |     |         |                     |         |                   |         |
| Multiple birth                                                | 858 | 17      | 2.5 (1.1–4.0)       | 0.0008  | 2.3 (0.9–3.7)     | 0.001   |
| Small for gestational age                                     | 851 | 14      | 6.5 (5.0–8.1)       | <0.0001 | 5.6 (4.1–7.0)     | <0.0001 |
| Boys                                                          | 858 | 51      | 0.1 (–1.1 to 1.2)   | 0.945   |                   |         |
| Mechanical ventilation                                        | 843 | 5       | 5.2 (2.7–8.7)       | 0.0001  | 4.6 (2.0–7.1)     | 0.0005  |
| First time mothers                                            | 824 | 64      | 1.3 (0.1–2.4)       | 0.036   | 1.2 (0.1–2.2)     | 0.03    |
| Mode of delivery, caesarean section                           | 857 | 47      | 1.2 (0.1–2.4)       | 0.031   |                   |         |
| Nipple shield use                                             | 844 | 51      | 0.2 (–0.9 to 1.3)   | 0.743   |                   |         |
| Test weighing at most breastfeeds                             | 850 | 32      | 0.2 (–1.0 to 1.4)   | 0.704   |                   |         |
| First breast milk expression, <6 hours pp (ref)               | 830 | 23      | 0                   |         | 0                 |         |
| 6–12 hours pp                                                 |     | 41      | 1.2 (–0.3–2.7)      | 0.11    | 0.3 (–1.0–1.7)    | 0.63    |
| 12–24 hours pp                                                |     | 24      | 1.3 (–0.4–2.9)      | 0.13    | 0.1 (–1.3–1.6)    | 0.85    |
| 24–48 hours pp                                                |     | 10      | 5.3 (3.1–7.4)       | <0.0001 | 2.7 (0.7–4.7)     | 0.009   |
| >48 hours pp                                                  |     | 2       | 7.1 (3.0–11.2)      | 0.0008  | 4.3 (0.5–8.0)     | 0.03    |
| <b>Earlier establishment of exclusive breastfeeding, days</b> |     |         |                     |         |                   |         |
| Gestational age groups, GA 24–27 weeks                        | 858 | 3       | –3.1 (–6.4–0.1)     | 0.06    | 0.1 (–3.5–3.6)    | 0.97    |
| GA 28–31 weeks                                                |     | 16      | 5.3 (3.7–6.8)       | <0.0001 | 5.8 (4.2–7.4)     | <0.0001 |
| GA 32–34 weeks                                                |     | 48      | 6.9 (5.8–8.1)       | <0.0001 | 7.1 (5.9–8.3)     | <0.0001 |
| GA 35–36 weeks (ref)                                          |     | 33      | 0                   |         | 0                 |         |
| Education, high (ref)                                         | 850 | 21      | 0                   |         |                   |         |
| Intermediate                                                  |     | 47      | 0.5 (–1.0 to 2.0)   | 0.499   |                   |         |
| Low                                                           |     | 32      | 0.9 (–0.7 to 2.5)   | 0.274   |                   |         |
| Maternal smoking                                              | 852 | 7       | 0.3 (–1.6 to 2.3)   | 0.750   |                   |         |
| Mother admitted together with infant to the NICU              | 851 | 30      | 1.0 (–0.2–2.5)      | 0.10    | 1.6 (0.4–2.8)     | 0.007   |
| Skin-to-skin contact on a daily basis after incubator care    | 851 | 57      | 1.5 (0.3–2.6)       | 0.011   | 1.1 (0.0–2.1)     | 0.046   |
| Pacifier use, no pacifier                                     | 839 | 13      | 0.9 (–0.9–2.6)      | 0.331   | 0.9 (–0.8–2.6)    | 0.30    |
| Minimising the use of a pacifier during BF establishment      |     | 33      | 2.1 (0.8–3.3)       | 0.001   | 1.2 (0.1–2.3)     | 0.04    |
| Unrestricted use of a pacifier (ref)                          |     | 54      | 0                   |         | 0                 |         |
| Mother speaking another language than Scandinavian at home    | 854 | 7       | 2.2 (0.0–4.5)       | 0.047   | 2.8 (0.6–5.0)     | 0.01    |

BF = breastfeeding, GA = gestational age, pp = postpartum  
doi:10.1371/journal.pone.0108208.t003

progression; however, we also think that the large variation in PMA within GA groups should encourage promotion of individualised assessment of the infant and individualised support for the mother.

### Strengths and limitations

The study is strengthened by its multicentre design, the large numbers of participants, the repeated telephone interviews to reduce re-call bias, and the reporting of direct breastfeeding, which often has lower rates than the rates of breast milk fed infants. Breastfeeding is often defined by WHO and many studies as breast milk feeding [9], [20], [56], [57], [58], [59].

A limitation is the high drop-out rate of extremely preterm infants. It is known that participants with poorer health outcomes are more reluctant to participate in surveys and drop out more often from cohorts [60]; that could indicate that even fewer of them established exclusive breastfeeding. The regression analysis was probably not affected by drop-out, as only exclusive breastfed infants were analysed, and the associations might persist. Another limitation is the weak definition of “first complete oral feeding”.

To achieve more accurate data, a more narrow definition is needed. In a large national survey with infants at many different NICUs, several different feeding and transition strategies may be used. A more narrow definition may not give better data because it might be answered by fewer participants (not all infants were test-weighed). The weak definition of “first complete feeding” did not seem to influence the mothers, given that the variation in PMA at this milestone was not larger than for the other milestones, indicating that Danish mothers of preterm infants tend to interpret “first complete breastfeeding” in a similar way. Late preterm infants’ higher PMA at establishment of exclusive breastfeeding could be due to the fact that most of those in the present study where admitted to a NICU because they needed neonatal care.

Breastfeeding rates in the present study may be biased both negatively and positively. We have reported the breastfeeding initiation rate of infants of mothers who planned to breastfeed and/or initiated breast milk expression. If infants of mothers who did not plan to breastfeed and did not initiate breastfeeding or breast milk expression were included in the analysis the breastfeeding initiation rate would decrease to 97%. The

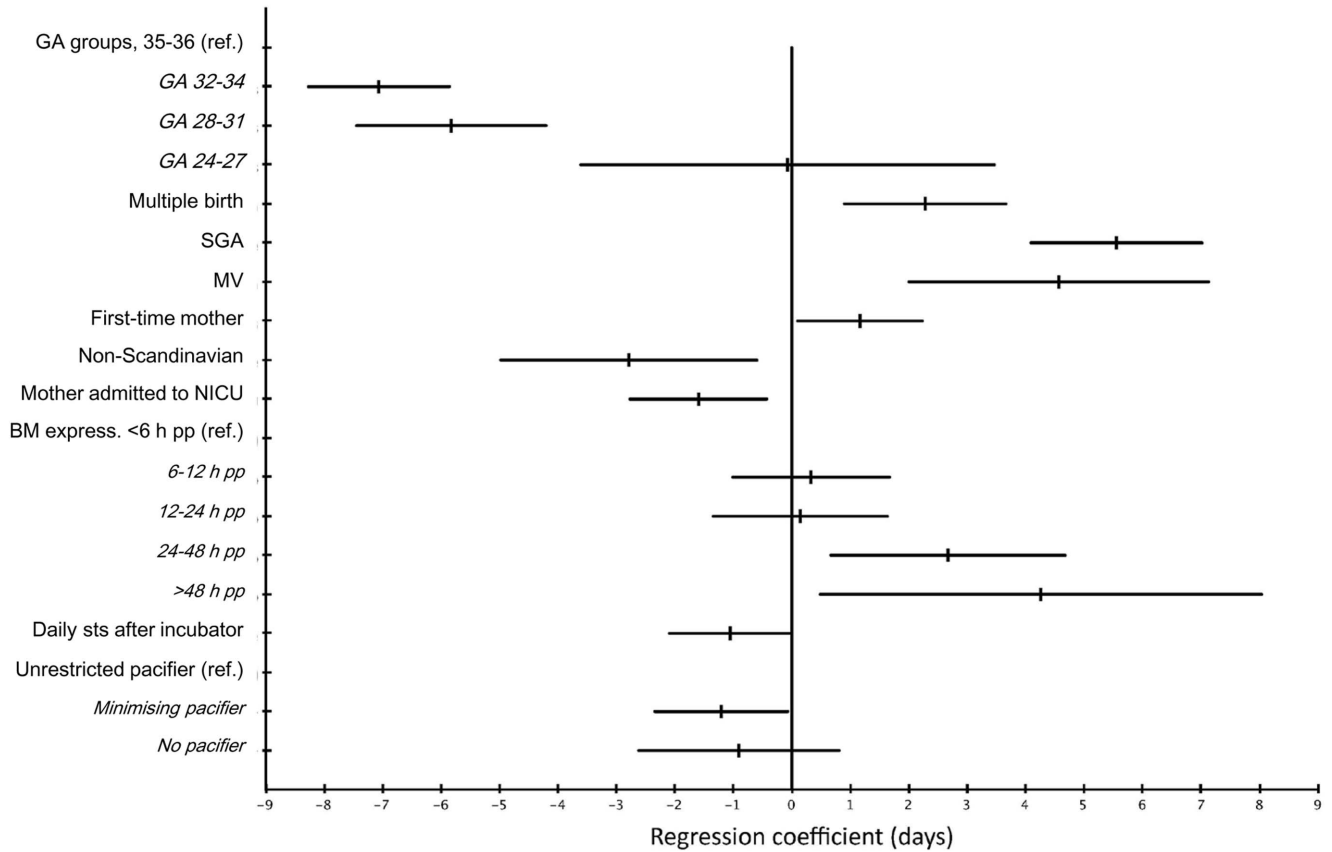

**Figure 4. Adjusted model of factors associated with PMA at establishment of exclusive breastfeeding.** BM = breast milk, GA = gestational age, MV = mechanical ventilation, NICU = neonatal intensive care unit, SGA = small for gestational age, sts = skin-to-skin contact  
doi:10.1371/journal.pone.0108208.g004

possibility that non-breastfeeding mothers declined to a greater degree to participate in the breastfeeding survey may have led to higher breastfeeding rates. This selection bias may also be present in other breastfeeding surveys with which we made comparisons [12], [13], [18]. The telephone interviews might have served as

interventions in helping mothers breastfeed longer –although that was not the purpose of the interviews – given that they could ask questions of the NICU nurses conducting the interviews. Also, mothers could breastfeed longer because they were participating in a cohort study (known as the Hawthorne effect) [61]. On the other

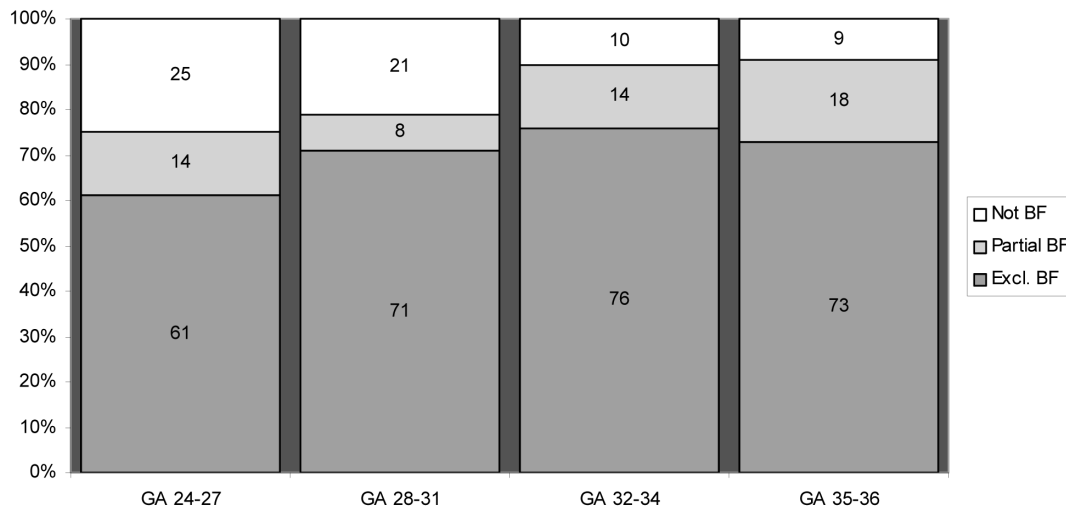

**Figure 5. Feeding method at full oral feeding for various gestational age groups.** BF = Breastfeeding, excl = exclusive, GA = gestational age  
doi:10.1371/journal.pone.0108208.g005

**Table 4.** Breastfeeding duration for various gestational age groups.

|                                   | N    | Total population | GA 24-27 | GA 28-31 | GA 32-34 | GA 35-36  |
|-----------------------------------|------|------------------|----------|----------|----------|-----------|
|                                   |      |                  | n = 60   | n = 257  | n = 688  | n = 483   |
| <b>Exclusive BF PNA</b>           |      |                  |          |          |          |           |
| Exclusive BF PNA 1 month          | 1488 | 66               | 63*      | 73*      | 65       | 64        |
| Exclusive BF PNA 4 months         | 1488 | 38               | 38       | 37       | 37       | 40        |
| Exclusive BF PNA 6 months         | 1488 | 13               | 27       | 23       | 11       | 8         |
|                                   |      |                  |          |          |          | p<0.0001  |
| <b>Any BF PNA</b>                 |      |                  |          |          |          |           |
| Any BF PNA 1 month                | 1488 | 85               | 95*      | 89*      | 84       | 82        |
| Any BF PNA 4 months               | 1488 | 57               | 62       | 59       | 57       | 56        |
| Any BF PNA 6 months               | 1488 | 44               | 50       | 47       | 43       | 44        |
| Any BF PNA 12 months              | 1488 | 12               | 8        | 14       | 12       | 10        |
| <b>Exclusive BF corrected age</b> |      |                  |          |          |          |           |
| Exclusive BF 1 month corr. age    | 1488 | 46               | 35       | 41       | 46       | 51        |
| Exclusive BF 4 months corr. age   | 1488 | 19               | 12       | 17       | 16       | 24        |
| Exclusive BF 6 months corr. age   | 1488 | 2                | 0        | 2        | 2        | 2         |
|                                   |      |                  |          |          |          | p = 0.016 |
| <b>Any BF corrected age</b>       |      |                  |          |          |          |           |
| Any BF 1 month corr. age          | 1488 | 68               | 60       | 63       | 69       | 69        |
| Any BF 4 months corr. age         | 1488 | 47               | 40       | 46       | 47       | 50        |
| Any BF 6 months corr. age         | 1488 | 34               | 28       | 30       | 33       | 36        |
| Any BF 12 months corr. age        | 1488 | 5                | 3        | 7        | 5        | 4         |
|                                   |      |                  |          |          |          | p = 0.004 |

BF = breastfeeding, corr = corrected, PNA = postnatal age (chronological age).

\*If an infant initiated breastfeeding, the duration was calculated from birth, likewise if exclusive breastfeeding was established. Thus some of these infants were tube-fed expressed breast milk at this time point. The percentage represents infants whose mothers' had not given up exclusive/any breastfeeding before one month.

doi:10.1371/journal.pone.0108208.t004

hand, exclusive breastfeeding duration may have been limited by being too pessimistic, considering that mothers of 117 infants, who were exclusively breastfed at discharge but completely weaned at first telephone interview, did not report duration of exclusive breastfeeding. Thus, duration was adjusted to the date of discharge.

## Conclusions

Danish mothers of preterm infants initiate breastfeeding to the same extent as mothers of term infants. Breastfeeding milestones are generally reached at different PNAs and PMAs depending on the GA group, but preterm infants are able to initiate breastfeeding within a few days depending on their physical condition. It might be expected that extremely preterm infants initiate breastfeeding at a higher PNA and, like SGA infants and infants of first-time mothers, establish exclusive breastfeeding at a higher PMA compared to other preterm infants, which is why patience is needed on the part of both mothers and staff. Admitting a mother directly to a NICU together with her infant and minimising the use of a pacifier during breastfeeding transition could contribute to

earlier establishment of exclusive breastfeeding. So action should be taken to encourage these practices. Breastfeeding competences are not developed at a fixed PMA, but rather are influenced by multiple factors in the infant, mother and clinical practice. The present study indicates that if a mother wants to establish exclusive breastfeeding, bottle-feeding should not be introduced at the NICU.

## Acknowledgments

The authors wish to thank the contact persons and nursing leaders at the Danish NICUs that participated in the study for their practical support despite scarce resources, not to mention the mothers and infants who participated.

## Author Contributions

Conceived and designed the experiments: RM SB KH AF AK IS HK. Performed the experiments: RM SB KH AF AK IS. Analyzed the data: RM BMH. Contributed reagents/materials/analysis tools: RM SB KH AF AK IS. Wrote the paper: RM BMH HK SB KH AF AK IS IH.

## References

- Rønnestad A, Abrahamson TG, Medbø S, Reigstad H, Lossius K, et al. (2005) Late-onset septicemia in a Norwegian national cohort of extremely premature infants receiving very early full human milk feeding. *Pediatrics*. 115(3): e269–276.
- Cristofalo EA, Schanler RJ, Blanco CL, Sullivan S, Trawoeger R, et al. (2013) Randomized trial of exclusive human milk versus preterm formula diets in extremely premature infants. *J Pediatr*. 163(6): 1592–1595.
- Anderson JW, Johnstone BM, Remley DT. (1999) Breastfeeding and cognitive development: a meta-analysis. *American Journal of Clinical Nutrition*. 70: 525–535.
- Morley R, Fewtrell MS, Abbott RA, Stephenson T, MacFadyen U, et al. (2004) Neurodevelopment in children born small for gestational age: a randomized trial of nutrient-enriched versus standard formula and comparison with a reference breastfed group. *Pediatrics*. 113(3 Pt 1): 515–521.
- Hoddinott P, Tappin D, Wright C (2008) Breast feeding. *BMJ* 336: 881–887.
- Schandler RJ, Schulman RJ, Lau C (1999) Feeding strategies for preterm infants: Beneficial outcomes of feeding fortified human milk versus preterm formula. *Pediatrics*. 103: 1150–1157.
- Bonet M, Blondel B, Agostino R, Combier E, Maier RF, et al. (2011) MOSAIC research group. Variations in breastfeeding rates for very preterm infants between regions and neonatal units in Europe: results from the MOSAIC cohort. *Arch Dis Child Fetal Neonatal Ed*. 96(6): F450–452.
- Smith MM, Durkin M, Hinton VJ, Bellinger D, Kuhn L (2003) Influence of breastfeeding on cognitive outcomes at age 6–8 years: follow-up of very low birth weight infants. *Am J Epidemiol*. 1; 158(11): 1075–1082.
- Pineda RG. Predictors of breastfeeding and breastmilk feeding among very low birth weight infants. (2011) *Breastfeed Med*. 6(1): 15–19.
- Demirci JR, Sereika SM, Bogen D (2013) Prevalence and predictors of early breastfeeding among late preterm mother-infant dyads. *Breastfeed Med*. 8(3): 277–285.
- Smithers LG, McPhee AJ, Gibson RA, Makrides M (2003) Characterisation of feeding patterns in infants born < 33 weeks gestational age. *Asia Pac J Clin Nutr*. 12 Suppl: S43.
- Dodrill P, Donovan T, Cleghorn G, McMahon S, Davies PS (2008) Attainment of early feeding milestones in preterm neonates. *J Perinatol*. 28(8): 549–555.
- Akerstrom S, Asplund I, Norman M (2007) Successful breastfeeding after discharge of preterm and sick newborn infants. *Acta Paediatr*. 96(10): 1450–1454.
- Maastrup R, Hansen BM, Kronborg H, Bojesen SN, Hallum K, et al. (2014) Factors associated with exclusive breastfeeding of preterm infants. Results from a prospective national cohort study. *PLoS ONE* 9(2): e89077
- Li R, Zhao Z, Mokdad A, Barker L, Grummer-Strawn L (2003) Prevalence of breastfeeding in the United States: the 2001 National Immunization Survey. *Pediatrics* 111: 1198–1201.
- Australian Bureau of Statistics 2001, '4810.0.55.001 Breastfeeding in Australia 2001'. Available: <http://www.abs.gov.au/ausstats/abs@nsf/ca79f63026ce2e9cca256886001514d7/4db9a8a50fc826ca256d1100053523?OpenDocument>. Accessed 2014 January 31.
- Official statistics of Sweden. Statistics – Health and Diseases. Breastfeeding, children born 2006 (Swedish). Available: [http://www.socialstyrelsen.se/Lists/Artikelkatalog/Attachments/8711/2008-125-12\\_200812512\\_rev.pdf](http://www.socialstyrelsen.se/Lists/Artikelkatalog/Attachments/8711/2008-125-12_200812512_rev.pdf). Accessed 2014 January 31.
- Kronborg H, Vaeth M (2004) The influence of psychosocial factors on the duration of breastfeeding. *Scand J Public Health*. 32: 210–216.
- Flacking R, Nyqvist KH, Ewald U, Wallin L (2003) Long-term duration of Breastfeeding in Swedish Low Birth Weight Infants. *J Hum Lact*. 19: 157–165.
- Perrella SL, Williams J, Nathan EA, Fenwick J, Hartmann PE, et al. (2012) Influences on breastfeeding outcomes for healthy term and preterm/sick infants. *Breastfeed Med*. 7: 255–261.
- Lucas A, Cole TJ (1990) Breast milk and neonatal necrotising enterocolitis. *Lancet*. 336: 1519–1523.
- Maastrup R, Bojesen SN, Kronborg H, Hallström I (2012) Breastfeeding Support in Neonatal Intensive Care: A National Survey. *J Hum Lact*. 28(3): 370–379.
- Nyqvist KH (2008) Early attainment of breastfeeding competence in very preterm infants. *Acta Paediatr* 97(6): 776–781.
- Nyqvist KH, Sjöden PO, Ewald U (1999) The development of preterm infants' breastfeeding behavior. *Early Hum Dev*. 55(3): 247–264.
- Amaizu N, Shulman R, Schanler R, Lau C (2008) Maturation of oral feeding skills in preterm infants. *Acta Paediatr*. 97(1): 61–67.
- Jadcherla SR, Wang M, Vijayapal AS, Leuthner SR (2010) Impact of prematurity and co-morbidities on feeding milestones in neonates: a retrospective study. *J Perinatol*. 30(3): 201–8.
- Lau C, Smith EO (2012) Interventions to improve the oral feeding performance of preterm infants. *Acta Paediatr*. 101(7): e269–74
- Simpson C, Schanler RJ, Lau C (2002) Early introduction of oral feeding in preterm infants. *Pediatrics*. 110(3): 517–22.
- Lau C, Geddes D, Mizuno K, Schaal B (2012) The development of oral feeding skills in infants. *Int J Pediatr*. 2012: 572341.
- Bragelien R, Røkke W, Markestad T (2007) Stimulation of sucking and swallowing to promote oral feeding in premature infants. *Acta Paediatr*. 96(10): 1430–1432.
- Gomez P, Baiges Nogues MT, Batiste Fernandez MT, Marca Gutierrez MM, Nieto Jurado A, et al (1998) Kangaroo method in delivery room for full-term babies [Metodo canguro en sala de partos en recién nacidos a término]. *Spanish. An Esp Pediatr*. 48(6): 631–633.
- Conde-Agudelo A, Belizán JM, Diaz-Rossello J (2011) Kangaroo mother care to reduce morbidity and mortality in low birthweight infants. *Cochrane Database Syst Rev*. 16(3): CD002771.
- WMA Declaration of Helsinki (2013) - Ethical Principles for Medical Research Involving Human Subjects. Available: <http://www.wma.net/en/30publications/10policies/b3/index.html> Accessed 2014 January 21.
- Lau on Health Care. Available: <https://www.retsinformation.dk/forms/r0710.aspx?id=130455>. Accessed 2014 January 31.
- World Health Organization (2013) Fact sheet N°363, Preterm birth. Available: <http://www.who.int/mediacentre/factsheets/fs363/en/>. Accessed 2014 January 31.
- Winterstein AG, Knox CA, Kubilis P, Hampp C (2013) Appropriateness of Age Thresholds for Respiratory Syncytial Virus Immunoprophylaxis in Moderate-Preterm Infants: A Cohort Study. *JAMA Pediatr*. 1; 167(12): 1118–1124.
- Engle WA; American Academy of Pediatrics Committee on Fetus and Newborn (2004) Age terminology during the perinatal period. *Pediatrics*. 114(5): 1362–1364.
- Altman DG (1991) Practical statistics for medical research. London. Chapman & Hall.

39. Verder H (2007) Nasal CPAP has become an indispensable part of the primary treatment of newborns with respiratory distress syndrome. *Acta Paediatr.* 96(4): 482–484.
40. Mörelius E, Angelhoff C, Eriksson J, Olhager E (2012) Time of initiation of skin-to-skin contact in extremely preterm infants in Sweden. *Acta Paediatr.* 101(1): 14–18.
41. Blomqvist YT, Ewald U, Gradin M, Nyqvist KH, Rubertsson C (2013) Initiation and extent of skin-to-skin care at two Swedish neonatal intensive care units. *Acta Paediatr.* 102(1): 22–28.
42. Pineda R (2011) Direct breast-feeding in the neonatal intensive care unit: is it important? *J Perinatol.* 31(8): 540–545.
43. Inder TE, Warfield SK, Wang H, Hüppi PS, Volpe JJ (2005) Abnormal cerebral structure is present at term in premature infants. *Pediatrics.* 115(2): 286–294.
44. Mewes AU, Hüppi PS, Als H, Rybicki FJ, Inder TE, et al. (2006) Regional brain development in serial magnetic resonance imaging of low-risk preterm infants. *Pediatrics.* 118(1): 23–33.
45. Als H, Duffy FH, McAnulty GB, Rivkin MJ, Vajapeyam S, et al. (2004) Early experience alters brain function and structure. *Pediatrics.* 113(4): 846–857.
46. Horbar JD, Carpenter JH, Badger GJ, Kenny MJ, Soll RF, et al. (2012) Mortality and neonatal morbidity among infants 501 to 1500 grams from 2000 to 2009. *Pediatrics.* 129(6): 1019–1026.
47. Nyqvist KH, Häggkvist AP, Hansen MN, Kylberg E, Frandsen AL, et al. (2013) Expansion of the Baby-Friendly Hospital Initiative Ten Steps to Successful Breastfeeding into Neonatal Intensive Care: Expert Group Recommendations. *J Hum Lact.* 29(3): 300–309.
48. Beck SA, Weiss J, Greisen G, Andersen M, Zoffmann V (2009) Room for family-centered care – a qualitative evaluation of a neonatal intensive care unit remodeling project. *Journal of Neonatal Nursing* 15: 88–99.
49. Wataker H, Meberg A, Nestaas E (2012) Neonatal family care for 24 hours per day: effects on maternal confidence and breast-feeding. *J Perinat Neonatal Nurs.* 26(4): 336–342.
50. Ortenstrand A, Westrup B, Broström EB, Sarman I, Akerström S, et al. (2010) The Stockholm Neonatal Family Centered Care Study: effects on length of stay and infant morbidity. *Pediatrics.* 125(2): e278–285.
51. Pinelli J, Symington A, Ciliska D (2002) Nonnutritive sucking in high-risk infants: benign intervention or legitimate therapy? *J Obstet Gynecol Neonatal Nurs.* 31: 582–591.
52. Scher MS, Ludington-Hoe S, Kaffashi F, Johnson MW, Holditch-Davis D, et al. (2009) Neurophysiologic assessment of brain maturation after an 8-week trial of skin-to-skin contact on preterm infants. *Clin Neurophysiol.* 120(10): 1812–1818.
53. Clum D, Primomo J (1996) Use of a silicone nipple shield with premature infants. *J Hum Lact.* 12(4): 287–290.
54. Meier PP, Brown LP, Hurst NM, Spatz DL, Engstrom JL, et al. (2000) Nipple shields for preterm infants: effect on milk transfer and duration of breastfeeding. *J Hum Lact.* 16(2): 106–114.
55. Christensen AM, Brixval CS, Svendsen M, Laursen B, Holstein BE (2011) [Annual report of children born in 2008 and 2009 from the database Children's Health: Breastfeeding in 14 municipalities.] Copenhagen: Steering Committee for the database Children's Health and the National Institute of Public Health. Danish. Available: [http://www.si-folkesundhed.dk/upload/%C3%A5rsrapport\\_fra\\_databasen\\_b%C3%B8rns\\_sundhed\\_juni\\_2011.pdf](http://www.si-folkesundhed.dk/upload/%C3%A5rsrapport_fra_databasen_b%C3%B8rns_sundhed_juni_2011.pdf). Accessed 2014 February 26.
56. World Health Organization (2008) Indicators for assessing infant and young child feeding practices: conclusions of a consensus meeting held 6–8 November 2007 in Washington D.C., USA. World Health Organization, Geneva.
57. Flacking R, Wallin L, Ewald U (2007) Perinatal and socioeconomic determinants of breastfeeding duration in very preterm infants. *Acta Paediatr.* 96(8): 1126–1130.
58. Renfrew MJ, Craig D, Dyson L, McCormick F, Rice S, et al. (2009) Breastfeeding promotion for infants in neonatal units: a systematic review and economic analysis. *Health Technol Assess* 13(40).
59. Parker M, Burnham L, Cook J, Sanchez E, Philipp BL, et al. (2013) 10 years after baby-friendly designation: breastfeeding rates continue to increase in a US neonatal intensive care unit. *J Hum Lact.* 29(3): 354–358.
60. Howe LD, Tilling K, Galobardes B, Lawlor DA (2013) Loss to follow-up in cohort studies: bias in estimates of socioeconomic inequalities. *Epidemiology.* 24(1): 1–9.
61. Polit DF, Beck CT (2010) *Essentials of Nursing Research*. Seventh edition. Philadelphia, Wolters Kluwer Health, Lippincott Williams & Wilkins.
